# Supplementary material
Source: publisher figshare collection journal article supplement (https://plos.figshare.com/articles/dataset/_/3164257)
Supplement: Supplementary file 1 [file 1 › S2 Fig.PDF]

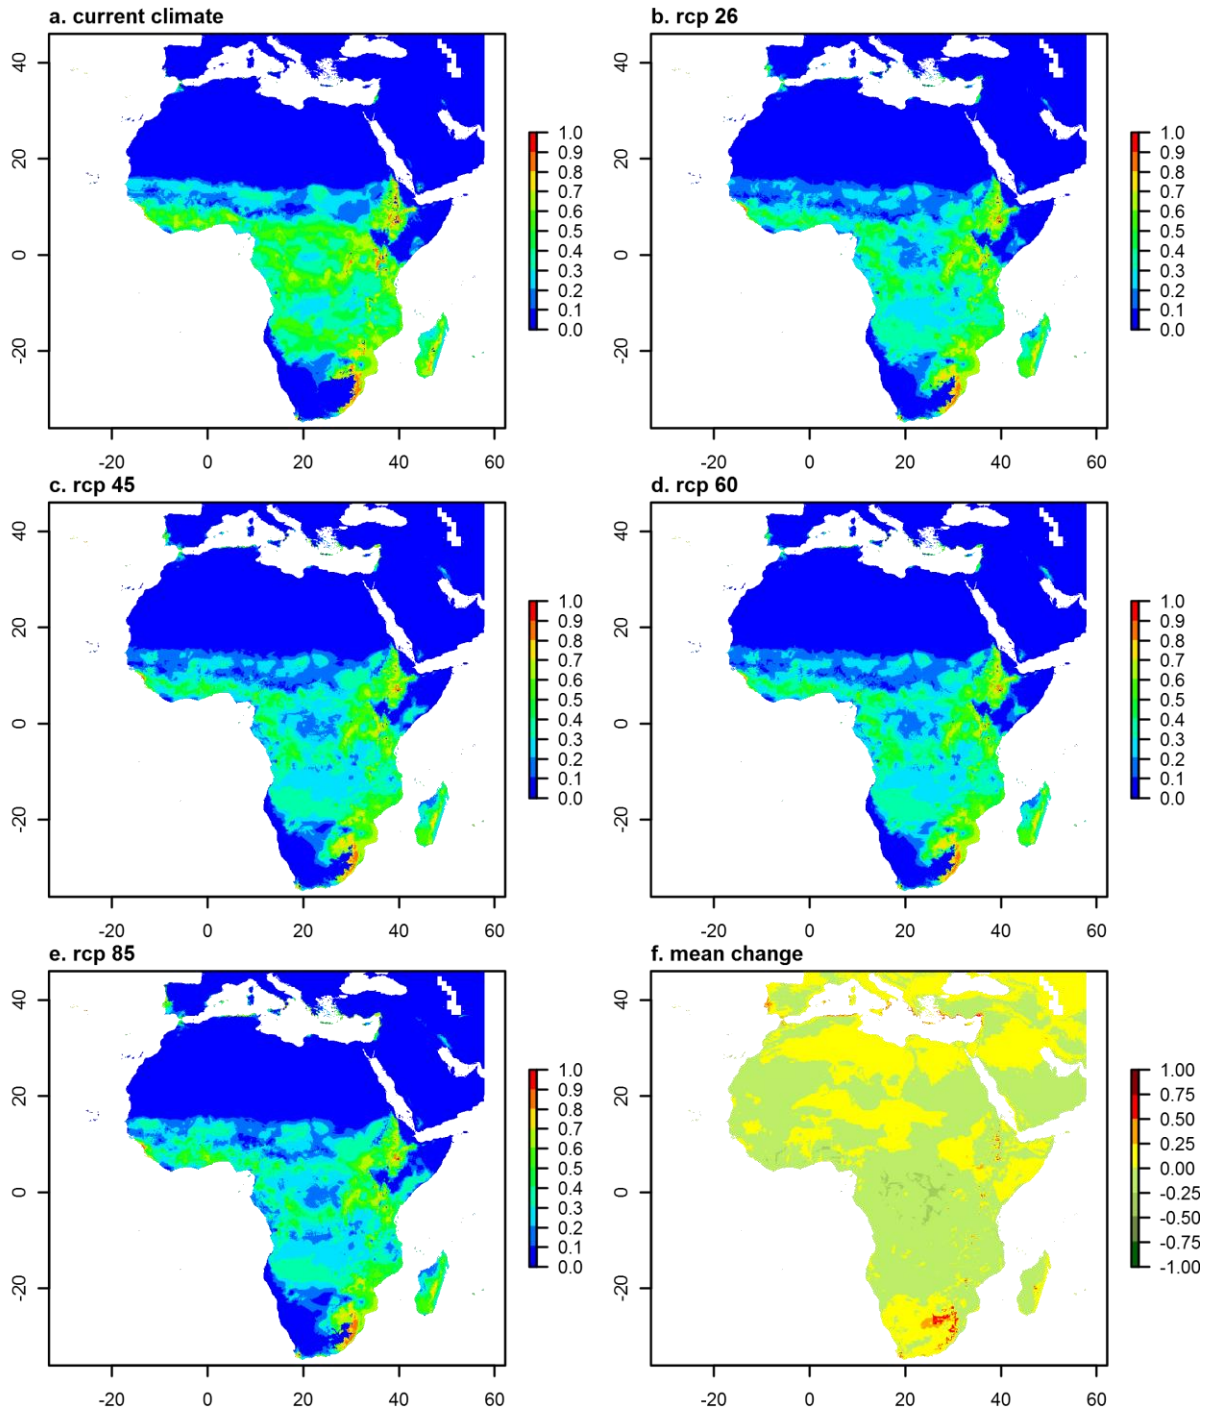

S2 Fig: Modelled habitat suitability for *Ceratitis cosyra* for current climatic conditions (a) and future climatic conditions (b - e) as mean values over suitability modelled from bioclimatic data for 3 different Generalized Circulation Models (GCM) under each representative concentration pathways (RCP) scenario as well as mean change over all RCP scenarios.
