# Supplementary material
Source: publisher figshare collection journal article supplement (https://plos.figshare.com/articles/dataset/_/3164257)
Supplement: Supplementary file 1 [file 1 › S4 Fig.PDF]

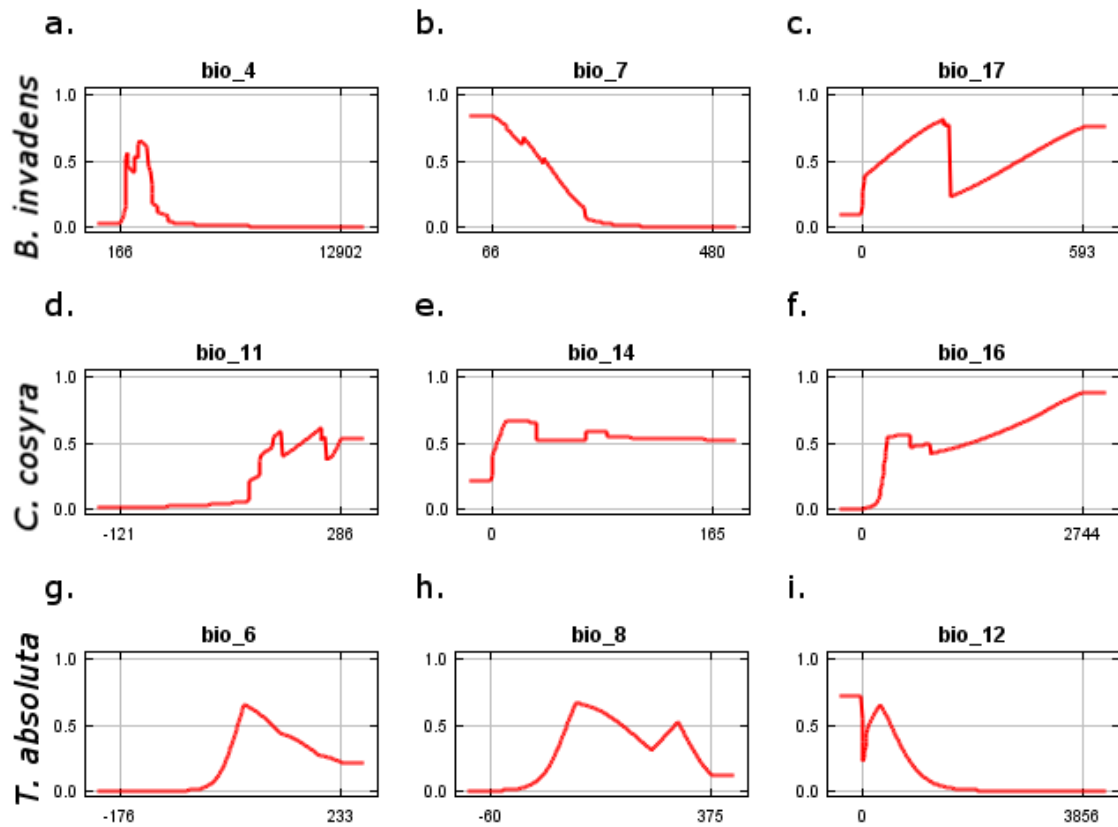

S4 Fig: Response curves of environmental variables indicating their effect on the predicted habitat suitability of Maxent with the logistic model output on the y-axis and the environmental variable on the x-axis. Response curves show effect of each variable in isolation on the model which makes interpretation of strongly correlated variables easier.
